# Supplementary material for: Pressure-induced abnormal insulating state in triangular layered cobaltite LixCoO2 (x = 0.9)
Source: Royal Society of Chemistry journal article supplement (doi:10.1039/c7ta06084j), 2017-01-01
Supplement: c7ta06084j1.pdf [file c7ta06084j1.pdf]

## Supporting Information

### Pressure-induced abnormal insulating state in the triangular layered cobaltite $\text{Li}_x\text{CoO}_2$ ( $x = 0.9$ )

Cong Xu<sup>1,#</sup>, Weiji Xiao<sup>2,#</sup>, Tongchao Liu<sup>2,#</sup>, Fei Sun<sup>1,3</sup>, Jiaxin Zheng<sup>2</sup>,  
Shang Peng,<sup>1</sup> Xuqiang Liu,<sup>1</sup> Feng Pan<sup>2,\*</sup>, and Wenge Yang<sup>1,4,\*</sup> Ho-kwang  
Mao<sup>1,2,4</sup>

<sup>1</sup>Center for High Pressure Science and Technology Advanced Research (HPSTAR), Shanghai 201203, China

<sup>2</sup>School of Advanced Materials, Peking University, Shenzhen Graduate School, Shenzhen, 518055, China

<sup>3</sup>Beijing National Laboratory for Condensed Matter Physics and Institute of Physics, Chinese Academy of Sciences,  
Beijing 100190, China

<sup>4</sup>High Pressure Synergetic Consortium (HPSynC), Geophysical Laboratory, Carnegie Institution of Washington, Argonne,  
Illinois 60439, United States

#These authors contributed equally to this work.

\*Correspondence and requests for materials should be addressed to [yangwg@hpstar.ac.cn](mailto:yangwg@hpstar.ac.cn) (W.Y.) or  
[panfeng@pkusz.edu.cn](mailto:panfeng@pkusz.edu.cn) (F.P.)

#### 1. Preparation of Delithiated Positive Electrode Materials.

Chemical delithiation of the  $\text{LiCoO}_2$  materials was achieved by stirring the powder  $\text{LiCoO}_2$  in acetonitrile solutions containing  $\text{NO}_2\text{BF}_4$  oxidizer in excess. The molar ratio of  $\text{LiCoO}_2$  and  $\text{NO}_2\text{BF}_4$  is 5:1 for preparing  $\text{Li}_{0.9}\text{CoO}_2$  samples. After 24 h of lithium extraction at room temperature, the  $\text{LiCoO}_2$  powder was washed with acetonitrile several times, and the solution was removed by centrifugation. The resulting materials were then dried at 80 °C.

Table S1. ICP-AES results of  $\text{LiCoO}_2$  and the chemically delithiated  $\text{LiCoO}_2$ . The values in the table are normalized with the cobalt content in the  $\text{LiCoO}_2$  and delithiated  $\text{LiCoO}_2$  samples.

| samples                      | Li content | Co content |
|------------------------------|------------|------------|
| $\text{LiCoO}_2$             | 1.02       | 1.00       |
| delithiated $\text{LiCoO}_2$ | 0.89       | 1.00       |

#### 2. The typical Rietveld refinement results.

The typical Rietveld refinement results of  $\text{Li}_{0.9}\text{CoO}_2$  at pressure 0.3 GPa and 19.8 GPa are summarized in Table 2.

TABLE S2. Structural parameters obtained from full Rietveld refinements of the diffraction diagrams for  $\text{Li}_{0.9}\text{CoO}_2$  collected at pressure 0.3 GPa and 19.8 GPa: lattice parameters; and volume of the unit cell.

| Parameter           | R-3m phase<br>at 0.3 GPa | R-3m phase<br>at 19.8 GPa |
|---------------------|--------------------------|---------------------------|
| a (Å)               | 2.8071(5)                | 2.7409(3)                 |
| c (Å)               | 13.9849(1)               | 13.3378(7)                |
| z (O)               | 0.24039(8)               | 0.24039(8)                |
| V (Å <sup>3</sup> ) | 95.4381(4)               | 86.7784(9)                |

Note: The relative atomic positions for Co, O and Li were fixed. The Li atoms occupy 3 a Wyckoff positions at (0, 0, 0), Co atoms occupy 3 b Wyckoff positions at (0, 0, 1/2) and O atoms occupy 6 c Wyckoff positions at (0, 0, 0.24039).

### 3. Structure optimization

Ferromagnetically spin-polarized, anti-ferromagnetically spin-polarized, as well as non-spin-polarized DFT were used to optimize the structure, respectively, at various values of external pressure.

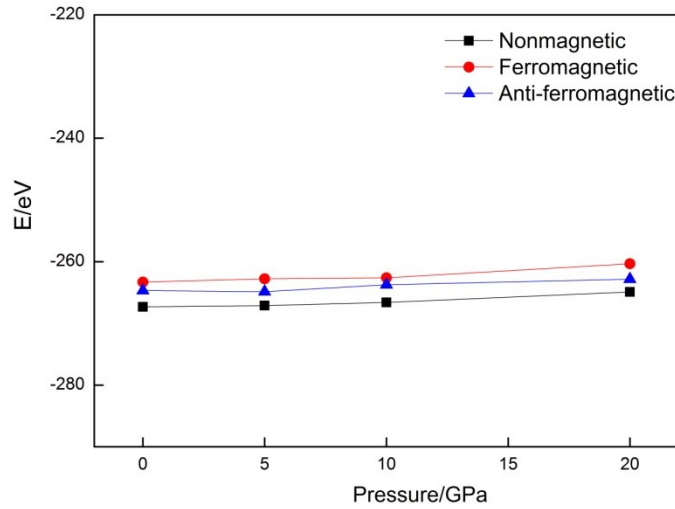

Figure S1. Energy differences between different magnetic structures at various external pressures.

### 4. Structure parameters of supercell of Li<sub>0.9</sub>CoO<sub>2</sub> obtained from DFT calculations.

Table S3. Structure parameters of supercell of Li<sub>0.9</sub>CoO<sub>2</sub> obtained from DFT calculations at various external pressures.

| Pressure (GPa) | a (Å)     | c (Å)      | Average Co-O bond length (Å) | Average CoO <sub>6</sub> octahedral volume (Å <sup>3</sup> ) | Average distortion parameter $\Delta_d$ of CoO <sub>6</sub> octahedron (10 <sup>-4</sup> ) |
|----------------|-----------|------------|------------------------------|--------------------------------------------------------------|--------------------------------------------------------------------------------------------|
| 0              | 5.6556(0) | 14.1272(2) | 1.9257(0)                    | 9.4224(9)                                                    | 0.3731(1)                                                                                  |

|    |           |             |           |           |           |
|----|-----------|-------------|-----------|-----------|-----------|
| 5  | 5.6092(9) | 13.8726(4)  | 1.9131(3) | 9.2519(2) | 0.3572(2) |
| 10 | 5.5689(5) | 13.6558(5)  | 1.9028(1) | 9.1116(7) | 0.3353(6) |
| 20 | 5.5016(7) | 13.2997(97) | 1.8846(8) | 8.8639(5) | 0.3204(7) |
| 40 | 5.3977(6) | 12.7782(2)  | 1.8574(9) | 8.5029(3) | 0.2939(0) |

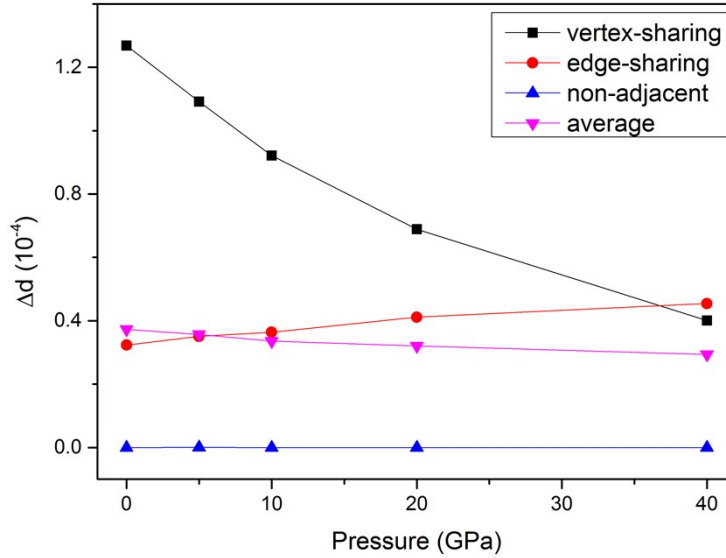

Figure S2. Distortion parameter  $\Delta_d$  of all  $\text{CoO}_6$  octahedrons in the supercell of  $\text{Li}_{10.9}\text{CoO}_2$  versus pressure. There are 12  $\text{CoO}_6$  octahedra in the  $2 \times 2 \times 1$  supercell, of which 2 are vertex-sharing with the vacancy-O octahedron (i.e. the  $\text{O}_6$  octahedron containing the Li vacancy), 6 are edge-sharing with the vacancy-O octahedron, and 4 are non-adjacent to the vacancy-O octahedron.

5.

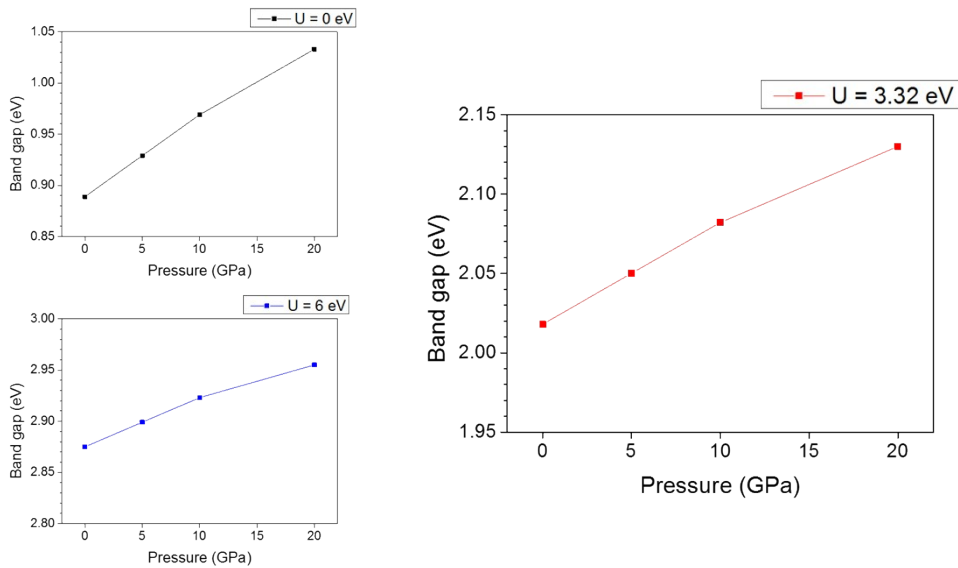

Figure S3. Calculated band gap under various external pressures with different Hubbard  $U$ .

6. High magnification scanning electron micrographs of  $\text{Li}_{0.9}\text{CoO}_2$  sample before and after high pressure process (up to 20 GPa).

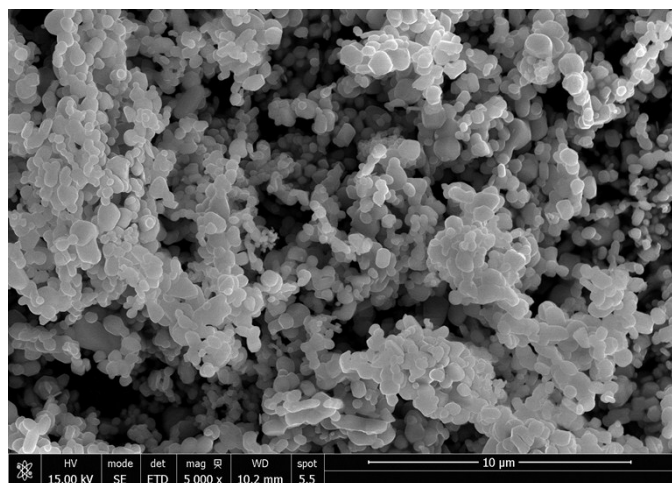

(a)

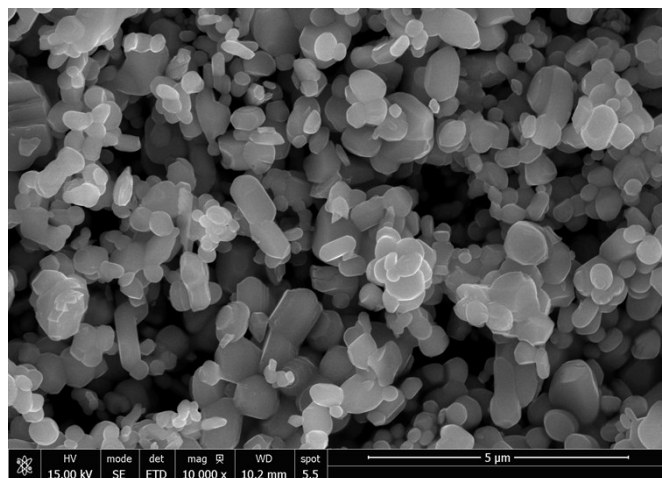

(b)

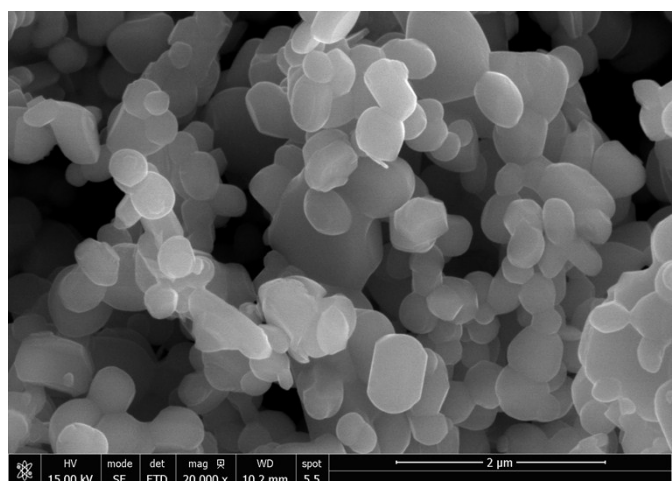

(c)

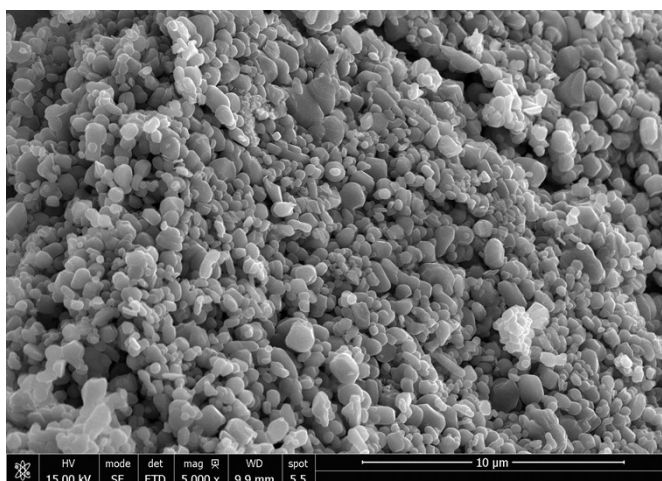

(d)

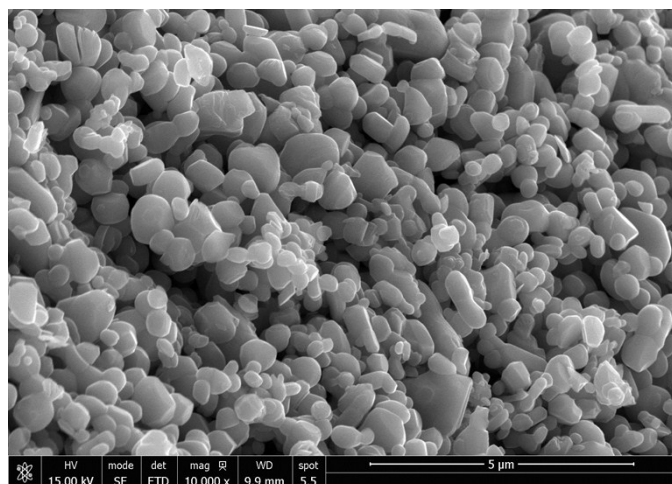

(e)

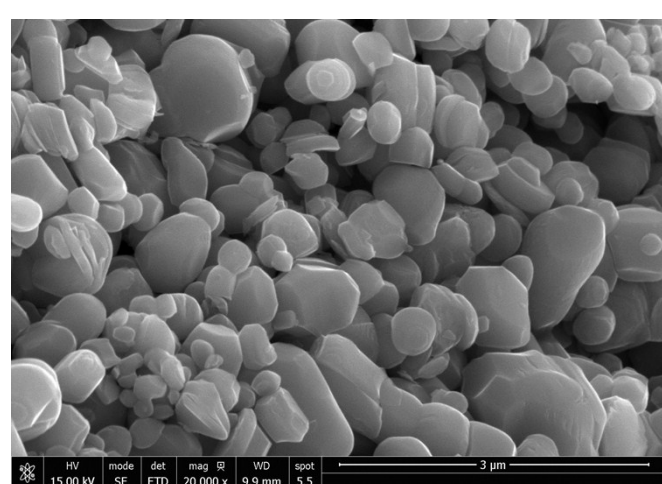

(f)

Fig. S4. High magnification scanning electron micrographs of  $\text{Li}_{0.9}\text{CoO}_2$  sample before and after high

pressure process (up to 20 GPa). (a-c) photomicrographs of  $\text{Li}_{0.9}\text{CoO}_2$  before high pressure process with different magnifications  $\times 5000$  (a),  $\times 10000$  (b),  $\times 20000$  (c); (d-f) micrographs of  $\text{Li}_{0.9}\text{CoO}_2$  after high pressure process with different magnifications  $\times 5000$  (d),  $\times 10000$  (e),  $\times 20000$  (f).
